# Supplementary material
Source: PubMed Central journal article supplement (PMC2773462)
Supplement: NIHMS151986-supplement-1.pdf [file NIHMS151986-supplement-1.pdf]

Supplemental Table 1: p53, PTEN and EGFR status for 20 GBM xenograft lines.

| <b>GBM#</b> | <b>p53</b>                | <b>PTEN</b>            | <b>EGFR</b> |
|-------------|---------------------------|------------------------|-------------|
| 5           | WT                        | WT                     | -           |
| 6           | R273C                     | WT                     | VIII        |
| 8           | WT                        | HD                     | WT          |
| 10          | WT                        | HD                     | -           |
| 12          | exon 2 splice site mutant | WT                     | WT          |
| 14          | WT                        | exon 1 - 2 bp deletion | -           |
| 15          | WT                        | WT                     | WT          |
| 16          | WT                        | HD                     | -           |
| 22          | R273C                     | WT                     | -           |
| 26          | WT                        | HD                     | WT          |
| 28          | M246T                     | G132D                  | -           |
| 34          | WT                        | WT                     | WT          |
| 36          | K132M                     | HD                     | -           |
| 38          | R110C                     | WT                     | WT          |
| 39          | WT                        | WT                     | VIII        |
| 43          | F270C                     | WT                     | -           |
| 44          | WT                        | WT                     | -           |
| 46          | WT                        | WT                     | VII         |
| 58          | WT                        | HD                     | -           |
| 59          | WT                        | HD                     | VIII        |

WT – wild-type

HD – homozygous deleted

For EGFR column, WT indicates amplified wild-type EGFR, VIII indicates amplified viii truncation mutant, VII indicates vii truncation mutant, '-' indicates no amplification
